# Supplementary material
Source: ML conference proceedings conference paper supplement (https://openreview.net/forum?id=p66AzKi6Xim)
Supplement: supplementary_material [file attachment]

## Sheet: results
Architecture	Accuracy	AUROC	AUROC_TS	ECE	ECE_TS	Parameters #	input size	Temperature	Coverage_for_Accuracy_99	Coverage_for_Accuracy_99_TS
adv_inception_v3	77.576	0.852231	0.858745	0.0234767	0.0380175	23834568	299	0.88454	0.00028	0.00033
alexnet_torchvision	56.518	0.848921	0.848305	0.0201861	0.0200191	61100840	224	1.08729	0.05344	0.04929
cait_m36_384	86.058	0.863726	0.869807	0.035097	0.0381565	271221352	384	0.90533	0.00024	0.00024
cait_m48_448	86.492	0.861891	0.868057	0.0391225	0.0396656	356460520	448	0.90033	0.00048	0.00116
cait_s24_224	83.452	0.858334	0.863007	0.0344116	0.0374505	46916200	224	0.90555	0.0019	0.00349
cait_s24_384	85.048	0.862822	0.867154	0.0349484	0.0314303	47062120	384	0.9151	0.00034	0.00076
cait_s36_384	85.454	0.865267	0.869343	0.0373421	0.0334627	68366632	384	0.91411	0.0001	0.0002
cait_xs24_384	84.06	0.862547	0.867172	0.0336978	0.0366823	26670088	384	0.90541	0.00156	0.00167
cait_xxs24_224	78.38	0.860349	0.861763	0.0319642	0.0299951	11956264	224	0.88721	0.00376	0.00596
cait_xxs24_384	80.966	0.863004	0.866944	0.0317557	0.0283473	12029224	384	0.88738	0.00104	0.00118
cait_xxs36_224	79.75	0.860713	0.864268	0.0293507	0.0315289	17299720	224	0.89095	0.00148	0.00344
cait_xxs36_384	82.2	0.863647	0.867541	0.0292342	0.0271297	17372680	384	0.89682	0.00252	0.00389
CLIP_linear_probe_RN101	72.474	0.821658	None	0.188431	None	119688033	224	None	None	None
CLIP_linear_probe_RN50x16	80.45	0.850805	None	0.0858025	None	290979217	384	None	None	None
CLIP_linear_probe_RN50x4	76.614	0.837716	None	0.122799	None	178300601	288	None	None	None
CLIP_linear_probe_RN50x64	83.61	0.863913	None	0.0344689	None	623258305	448	None	None	None
CLIP_linear_probe_ViT-B~16	79.85	0.859253	None	0.013175	None	149620737	224	None	None	None
CLIP_linear_probe_ViT-B~32	75.664	0.853511	None	0.0129807	None	151277313	224	None	None	None
CLIP_linear_probe_ViT-L~14	83.664	0.87006	None	0.0253213	None	427616513	224	None	None	None
CLIP_linear_probe_ViT-L~14@336px	84.358	0.87455	None	0.0243555	None	427944193	336	None	None	None
CLIP_RN101	62.354	0.806624	0.807944	0.020344	0.0186837	119688033	224	0.95522	0.2146	0.2146
CLIP_RN50	60.2	0.802909	0.802995	0.0220014	0.0186272	102007137	224	0.96852	0.15624	0.15624
CLIP_RN50x16	70.846	0.826869	0.826534	0.0326527	0.0207107	290979217	384	1.05306	0.3507	0.3507
CLIP_RN50x4	66.192	0.812124	0.812707	0.0214101	0.0211936	178300601	288	0.99973	0.27057	0.27057
CLIP_RN50x64	74.526	0.830997	0.828352	0.0595392	0.0268521	623258305	448	1.15049	0.41175	0.41175
CLIP_ViT-B~16	68.682	0.819803	0.819545	0.0155275	0.016899	149620737	224	0.97983	0.30839	0.30839
CLIP_ViT-B~32	63.744	0.808383	0.809792	0.0236784	0.0195568	151277313	224	0.94744	0.21551	0.21551
CLIP_ViT-L~14	75.864	0.835278	0.832933	0.0362589	0.0191556	427616513	224	1.0965	0.45548	0.45548
CLIP_ViT-L~14@336px	76.966	0.836514	0.836032	0.0304919	0.0189987	427944193	336	1.07865	0.48737	0.48737
coat_lite_mini	79.102	0.863591	0.871021	0.107135	0.0295812	11011560	224	0.80855	0.00016	0.00018
coat_lite_small	82.31	0.858011	0.866376	0.0664388	0.0388938	19838504	224	0.84835	0.00022	0.00027
coat_lite_tiny	77.514	0.858069	0.863593	0.115992	0.0242713	5721960	224	0.80222	0.00094	0.00093
coat_mini	81.272	0.862997	0.867626	0.0720769	0.0368162	10337004	224	0.84137	0.0015	0.00273
coat_tiny	78.43	0.859703	0.865375	0.093504	0.0374222	5498540	224	0.81559	0.00022	0.00051
convit_base	82.288	0.860762	0.871623	0.0817599	0.0323244	86540040	224	0.83802	0.00138	0.00136
convit_small	81.418	0.861595	0.867932	0.0918471	0.0284757	27777322	224	0.82919	0.00054	0.00062
convit_tiny	73.116	0.857142	0.860839	0.112404	0.0259645	5710512	224	0.8016	0.00288	0.00293
cspdarknet53	80.054	0.848444	0.863122	0.134755	0.0262902	27642184	256	0.75872	0.0017	0.00209
cspresnet50	79.574	0.845952	0.864272	0.138769	0.0262748	21616168	256	0.75067	0.00076	0.0006
cspresnext50	80.048	0.840423	0.861554	0.156146	0.0294965	20569896	224	0.74488	0.00554	0.00711
deit_base_distilled_patch16_224	83.386	0.868615	0.86353	0.0595236	0.0237281	87338192	224	1.18381	0.00184	0.00036
deit_base_distilled_patch16_384	85.426	0.87049	0.86088	0.0704824	0.0342249	87630032	384	1.24184	0.00046	0.0004
deit_base_patch16_224	81.99	0.855598	0.865416	0.0653716	0.0431038	86567656	224	0.84364	8e-05	0.00038
deit_base_patch16_384	83.102	0.856949	0.8677	0.0730111	0.0347792	86859496	384	0.84568	0.00012	0.00013
deit_small_distilled_patch16_224	81.216	0.8689	0.867977	0.0484716	0.0256322	22436432	224	1.10025	0.00128	0.00051
deit_small_patch16_224	79.852	0.861204	0.868404	0.0810675	0.0356074	22050664	224	0.8378	0.00068	0.00056
deit_tiny_distilled_patch16_224	74.504	0.861978	0.862218	0.0122335	0.0131844	5910800	224	0.98873	0.00034	0.00031
deit_tiny_patch16_224	72.176	0.854473	0.857954	0.120089	0.0235337	5717416	224	0.7908	0.0009	0.00078
deit3_base_patch16_224	83.784	0.857257	0.863895	0.0605556	0.0400698	86585320	224	0.85303	0.7167	0.7167
deit3_base_patch16_224_in21ft1k	85.71	0.856643	0.862728	0.0426624	0.0318988	86585320	224	0.87639	7e-05	7e-05
deit3_base_patch16_384	85.074	0.855511	0.862258	0.0602544	0.0364052	86877160	384	0.85819	0.00338	0.00467
deit3_base_patch16_384_in21ft1k	86.744	0.850913	0.859712	0.0462033	0.0370066	86877160	384	0.86964	0.00038	0.78745
deit3_huge_patch14_224	85.222	0.85612	0.861518	0.057494	0.0364025	632126440	224	0.85503	0.75189	0.75189
deit3_huge_patch14_224_in21ft1k	87.186	0.85656	0.866448	0.0372064	0.0347134	632126440	224	0.88923	0.00031	0.79965
deit3_large_patch16_224	84.774	0.847679	0.855508	0.0482339	0.0438636	304374760	224	0.86935	0.00116	0.73578
deit3_large_patch16_224_in21ft1k	86.982	0.863853	0.868166	0.0383568	0.0315727	304374760	224	0.90466	0.00011	0.79992
deit3_large_patch16_384	85.812	0.863722	0.869618	0.0504571	0.037067	304763880	384	0.86078	0.76954	0.76954
deit3_large_patch16_384_in21ft1k	87.722	0.861163	0.865344	0.0398306	0.0366139	304763880	384	0.89997	0.00018	0.81647
deit3_medium_patch16_224	83.086	0.856114	0.86314	0.0716315	0.035257	38849512	224	0.84505	9e-05	0.7015
deit3_medium_patch16_224_in21ft1k	84.546	0.857185	0.863532	0.0528419	0.0378146	38849512	224	0.85661	0.73169	0.73169
deit3_small_patch16_224	81.368	0.878557	0.87762	0.0261142	0.0561675	22059496	224	0.85232	0.66939	0.66939
deit3_small_patch16_224_in21ft1k	83.074	0.860203	0.866348	0.0577353	0.0368713	22059496	224	0.8476	0.6995	0.6995
deit3_small_patch16_384	83.434	0.857504	0.866593	0.0846715	0.0368054	22205416	384	0.82837	0.70945	0.70945
deit3_small_patch16_384_in21ft1k	84.826	0.853146	0.86185	0.0587621	0.0311992	22205416	384	0.85609	0.73821	0.73821
densenet121	75.574	0.851804	0.860458	0.0936317	0.0166888	7978856	224	0.80246	0.00792	0.06602
densenet121_torchvision	74.434	0.860952	0.859261	0.0252555	0.0182984	7978856	224	1.06791	0.1825	0.1654
densenet161_torchvision	77.138	0.863415	0.86125	0.056418	0.0206962	28681000	224	1.2071	0.00088	0.0008
densenet169_torchvision	75.6	0.863937	0.862341	0.0548896	0.0187751	14149480	224	1.1934	0.03446	0.00198
densenet201_torchvision	76.896	0.862852	0.862157	0.0329944	0.0177011	20013928	224	1.10205	0.00152	0.00402
densenetblur121d	76.576	0.852757	0.860589	0.0696233	0.0177782	7998088	224	0.83485	0.05516	0.06747
dla102	78.026	0.869311	0.867726	0.0397004	0.0189172	33268888	224	1.13305	0.20976	0.19733
dla102x	78.508	0.869282	0.867532	0.0450061	0.0183735	26309272	224	1.17083	0.2267	0.00633
dla102x2	79.452	0.862866	0.859143	0.0605488	0.0306755	41282200	224	1.2631	0.19868	0.00093
dla169	78.71	0.86951	0.867181	0.0478668	0.0180453	53389720	224	1.1988	0.19282	0.18202
dla34	74.636	0.869095	0.86851	0.0209337	0.0124692	15742104	224	1.08006	0.00528	0.00513
dla46_c	64.878	0.848644	0.848941	0.0212257	0.0175486	1301400	224	0.98944	0.0556	0.05527
dla46x_c	65.98	0.850562	0.849901	0.0162741	0.0136318	1068440	224	0.98978	0.0009	0.00093
dla60	77.022	0.868453	0.866738	0.0258898	0.0188577	22036632	224	1.10557	0.0013	0.19002
dla60_res2net	78.472	0.851883	0.860272	0.0523712	0.0291892	20848072	224	0.84727	0.00058	0.00049
dla60_res2next	78.448	0.853987	0.860182	0.0469253	0.0313016	17032984	224	0.85001	0.00134	0.00258
dla60x	78.242	0.865222	0.863809	0.0348341	0.0206009	17352344	224	1.11524	0.0009	0.00162
dla60x_c	67.906	0.857598	0.857102	0.0119433	0.0123511	1319832	224	0.99927	0.00032	0.00027
dm_nfnet_f0	81.98	0.855592	0.866813	0.0810227	0.0274109	71489284	192	0.8442	0.00188	0.02998
dm_nfnet_f1	83.736	0.862323	0.870136	0.0633267	0.0318825	132634256	224	0.85449	8e-05	9e-05
dm_nfnet_f2	84.426	0.855313	0.863429	0.0517813	0.0386503	193779228	256	0.86468	0.00016	0.00018
dm_nfnet_f3	85.166	0.868857	0.87196	0.0347164	0.0286605	254924200	320	0.90261	0.0006	0.00067
dm_nfnet_f4	85.536	0.866879	0.870762	0.0424975	0.0341911	316069172	384	0.89294	0.00082	0.00056
dm_nfnet_f5	85.668	0.864152	0.868968	0.0470498	0.0362442	377214144	416	0.89539	0.00022	0.00027
dm_nfnet_f6	86.024	0.877687	0.88138	0.0508376	0.026035	438359116	448	0.8629	4e-05	4e-05
dpn107	80.164	0.870434	0.867578	0.0691694	0.0302016	86917800	224	1.27498	0.18142	0.00789
dpn131	79.828	0.871496	0.869256	0.0686928	0.0324204	79254504	224	1.25183	0.00168	0.22144
dpn68	76.306	0.86807	0.866647	0.0432736	0.0215124	12611602	224	1.12103	0.19174	0.18564
dpn68b	79.208	0.851099	0.861719	0.0898119	0.0364839	12611602	224	0.8132	0.00064	0.00076
dpn92	80.016	0.867383	0.865521	0.0567641	0.0284271	37668392	224	1.16786	0.16362	0.15122
dpn98	79.636	0.872065	0.869276	0.0659538	0.0320339	61570728	224	1.22714	0.00118	0.20644
eca_nfnet_l0	81.594	0.860039	0.872413	0.0992602	0.0318655	24143924	224	0.80762	0.00142	0.00153
eca_nfnet_l1	83.33	0.841391	0.85706	0.0827303	0.0413954	41407728	256	0.82993	0.00024	0.00076
eca_nfnet_l2	84.4	0.849787	0.863498	0.0943998	0.0334458	56722348	320	0.82539	0.00042	0.00033
ecaresnet101d	82.166	0.82785	0.85514	0.153628	0.0322637	44568563	224	0.78228	0.001	0.00582
ecaresnet101d_pruned	80.808	0.827433	0.832341	0.0230921	0.0395252	24876040	224	0.94517	0.00064	0.001
ecaresnet269d	84.866	0.852685	0.867148	0.124297	0.0385717	102093077	320	0.80315	0.00044	0.00036
ecaresnet26t	78.956	0.856233	0.868241	0.162471	0.0320619	16011916	256	0.74637	0.00108	0.00058
ecaresnet50d	80.604	0.843008	0.861462	0.161228	0.0319053	25576350	224	0.76738	0.00106	0.00096
ecaresnet50d_pruned	79.718	0.84665	0.85122	0.00710557	0.0341087	19939713	224	0.91907	0.00912	0.00951
ecaresnet50t	81.396	0.850803	0.862545	0.122389	0.038102	25573814	256	0.80312	0.0006	0.00056
ecaresnetlight	80.454	0.841493	0.859016	0.151826	0.0355507	30162046	224	0.77971	0.00062	0.00071
efficientnet_b0	77.692	0.856681	0.865679	0.0683473	0.021748	5288548	224	0.8378	0.0002	0.00022
efficientnet_b1	77.428	0.838745	0.854335	0.0921068	0.0338274	7794184	224	0.82669	0.00012	7e-05
efficientnet_b1_pruned	78.242	0.857448	0.865784	0.0789576	0.0235213	6331916	240	0.83555	0.00036	0.0004
efficientnet_b2	79.542	0.849435	0.860062	0.0751202	0.0301337	9109994	256	0.83934	0.00028	0.00031
efficientnet_b2_pruned	79.918	0.853723	0.862088	0.0732991	0.0289325	8309737	260	0.83815	0.00012	0.00316
efficientnet_b3	81.482	0.843968	0.860738	0.105951	0.0324993	12233232	288	0.81452	0.00368	0.00356
efficientnet_b3_pruned	80.856	0.853358	0.864948	0.108516	0.0314038	9855020	300	0.79751	0.00128	0.00124
efficientnet_b4	82.758	0.84857	0.864536	0.135511	0.0344635	19341616	320	0.7897	0.00592	0.00609
efficientnet_el	81.316	0.850303	0.863286	0.0855596	0.0254872	10589712	300	0.81806	0.00092	0.00069
efficientnet_el_pruned	80.304	0.85406	0.864498	0.0830405	0.0251982	10589712	300	0.819	0.00032	0.00033
efficientnet_em	79.244	0.854254	0.865436	0.100214	0.0234626	6899496	240	0.79559	0.0012	0.00142
efficientnet_es	78.054	0.855779	0.86535	0.0943586	0.0211718	5438392	224	0.79024	0.00018	7e-05
efficientnet_es_pruned	75.006	0.853443	0.862562	0.0992827	0.0149974	5438392	224	0.7965	0.00362	0.00842
efficientnet_lite0	75.472	0.857057	0.8625	0.0724515	0.0140507	4652008	224	0.83703	0.0016	0.01253
efficientnetv2_rw_m	84.294	0.85422	0.866093	0.126373	0.0370398	53236442	320	0.80963	0.0002	0.00018
efficientnetv2_rw_s	82.878	0.847424	0.862606	0.108693	0.0401046	23941296	288	0.81976	0.00096	0.00138
efficientnetv2_rw_t	81.38	0.84408	0.857441	0.0951624	0.0405792	13649388	224	0.83156	2e-05	0
ens_adv_inception_resnet_v2	79.976	0.840312	0.8459	0.0302965	0.0374991	55843464	299	0.93283	0.00012	9e-05
ese_vovnet19b_dw	76.804	0.853996	0.864825	0.122918	0.0279763	6543080	224	0.77558	0.00794	0.00216
ese_vovnet39b	79.32	0.861357	0.865788	0.0687581	0.0278228	24568936	224	0.84174	0.0016	0.00167
fbnetc_100	75.12	0.842256	0.852898	0.0627457	0.0342934	5572200	224	0.83754	0.00308	0.00264
gc_efficientnetv2_rw_t	81.28	0.842672	0.855813	0.108695	0.0410934	13677713	224	0.82202	0.0008	0.00138
gernet_l	81.354	0.848137	0.867846	0.265302	0.048009	31078280	256	0.70455	0.00086	0.00127
gernet_m	80.73	0.821042	0.860803	0.253148	0.0245787	21142920	224	0.6746	0.0157	0.02211
gernet_s	76.908	0.835609	0.86106	0.180536	0.0179397	8173761	224	0.70902	0.00128	0.00213
ghostnet_100	73.982	0.853285	0.85975	0.0667436	0.0180372	5182508	224	0.85028	0.00098	0.00136
gluon_inception_v3	78.804	0.855829	0.864664	0.0740694	0.0364415	23834568	299	0.83475	0.0055	0.00424
gluon_resnet101_v1b	79.304	0.853117	0.861658	0.0488878	0.0362354	44549160	224	0.85031	0.00122	0.00116
gluon_resnet101_v1c	79.544	0.853772	0.864352	0.0467653	0.0333797	44568392	224	0.86118	0.00034	0.00036
gluon_resnet101_v1d	80.424	0.849909	0.861762	0.0718678	0.0355322	44568392	224	0.83769	0.00032	0.00029
gluon_resnet101_v1s	80.3	0.863177	0.864637	0.0116412	0.0271003	44672936	224	0.94084	0.0002	0.00024
gluon_resnet152_v1b	79.692	0.855888	0.856999	0.0218352	0.0342011	60192808	224	0.96173	0.0007	0.00058
gluon_resnet152_v1c	79.916	0.854755	0.855421	0.0236278	0.0323703	60212040	224	0.97108	8e-05	0.00016
gluon_resnet152_v1d	80.47	0.855076	0.855851	0.0349019	0.047393	60212040	224	0.96458	0.00118	0.00029
gluon_resnet152_v1s	81.012	0.866162	0.866978	0.0242205	0.0298907	60316584	224	0.98401	0.00088	0.00087
gluon_resnet18_v1b	70.83	0.860055	0.859943	0.0144929	0.0144378	11689512	224	1.01972	0.00136	0.00116
gluon_resnet34_v1b	74.58	0.867216	0.86715	0.0217922	0.0142977	21797672	224	1.05384	0.19106	0.19182
gluon_resnet50_v1b	77.578	0.854049	0.8647	0.0599436	0.034893	25557032	224	0.83135	2e-05	0.00504
gluon_resnet50_v1c	78.01	0.855022	0.864209	0.0589743	0.0297548	25576264	224	0.84732	0.00132	0.00156
gluon_resnet50_v1d	79.074	0.850855	0.862121	0.0873898	0.0392935	25576264	224	0.80376	0.00028	0.00033
gluon_resnet50_v1s	78.712	0.868859	0.869862	0.0205	0.0257889	25680808	224	0.97842	8e-05	2e-05
gluon_resnext101_32x4d	80.334	0.847495	0.859032	0.0582695	0.0386454	44177704	224	0.84861	0.00026	0.00382
gluon_resnext101_64x4d	80.602	0.84469	0.856621	0.0573336	0.0474963	83455272	224	0.84185	0.00032	2e-05
gluon_resnext50_32x4d	79.356	0.852922	0.861334	0.04536	0.0358806	25028904	224	0.85986	0.00058	0
gluon_senet154	81.224	0.846253	0.856559	0.0506447	0.041467	115088984	224	0.86221	0.00014	0.00011
gluon_seresnext101_32x4d	80.902	0.838236	0.852489	0.0710919	0.0449739	48955416	224	0.83333	0.0006	0.00064
gluon_seresnext101_64x4d	80.89	0.831823	0.842226	0.0336419	0.0404442	88232984	224	0.88378	0.00068	0.00084
gluon_seresnext50_32x4d	79.912	0.845851	0.860552	0.0932994	0.040205	27559896	224	0.81839	0.00082	0.00078
gluon_xception65	79.718	0.860214	0.85202	0.0938177	0.0339698	39916312	299	1.49995	0.0006	0.00338
gmixer_24_224	78.026	0.856664	0.863106	0.0523574	0.0498842	24721096	224	0.89365	8e-05	9e-05
gmlp_s16_224	79.644	0.858396	0.863179	0.0528609	0.0494084	19422656	224	0.88664	0.00082	0.00253
googlenet_torchvision	69.778	0.848873	0.853769	0.0626248	0.0233945	6624904	224	0.83454	0.00128	0.00124
hardcorenas_a	75.916	0.863473	0.867359	0.0444765	0.00692888	5260232	224	0.89721	0.06054	0.07013
hardcorenas_b	76.53	0.862126	0.867055	0.0480383	0.0103139	5176544	224	0.87807	0.02112	0.04653
hardcorenas_c	77.056	0.861656	0.867258	0.048837	0.00953466	5521224	224	0.87771	0.07708	0.09951
hardcorenas_d	77.432	0.862001	0.867112	0.0317315	0.0151351	7500208	224	0.90726	0.01142	0.00876
hardcorenas_e	77.788	0.863256	0.867735	0.0326462	0.0192309	8070992	224	0.89695	0.01454	0.01316
hardcorenas_f	78.094	0.857922	0.863585	0.0474868	0.0230805	8199688	224	0.87163	0.0089	0.01
hrnet_w18	76.756	0.866715	0.865543	0.0218149	0.0144959	21299004	224	1.07161	0.00088	0.00264
hrnet_w18_small	72.342	0.859567	0.859525	0.0194228	0.0204627	13187464	224	1.0026	0.00042	0.00038
hrnet_w18_small_v2	75.126	0.86333	0.863889	0.0157105	0.0193007	15597464	224	1.041	0.00132	0.00091
hrnet_w30	78.196	0.865916	0.865457	0.0312909	0.0143092	37712220	224	1.115	0.20636	0.21513
hrnet_w32	78.448	0.866526	0.865978	0.0292778	0.0137188	41232680	224	1.1087	0.18268	0.19033
hrnet_w40	78.932	0.866905	0.865419	0.040461	0.0160981	57557160	224	1.14427	0.21516	0.16962
hrnet_w44	78.894	0.866557	0.864994	0.0442242	0.0155356	67064984	224	1.14457	0.0031	0.003
hrnet_w48	79.31	0.863669	0.86304	0.0450875	0.0159123	77469864	224	1.16705	0.0015	0.0008
hrnet_w64	79.472	0.865581	0.862362	0.0609586	0.0213489	128059944	224	1.20955	0.08538	0.05955
ig_resnext101_32x16d	84.176	0.857777	0.850975	0.0757423	0.0399738	194026792	224	1.33672	0.00118	0.00202
ig_resnext101_32x32d	85.092	0.868097	0.862999	0.0603293	0.0266911	468530472	224	1.23188	0.17916	0.00013
ig_resnext101_32x48d	85.442	0.869211	0.864375	0.063518	0.0311996	828411176	224	1.23239	0.00194	0.00107
ig_resnext101_32x8d	82.688	0.848937	0.841997	0.0818683	0.0455724	88791336	224	1.39186	0.00054	0.02491
inception_resnet_v2	80.46	0.845288	0.849131	0.0293117	0.0425949	55843464	299	0.93113	2e-05	2e-05
inception_v3_torchvision	77.294	0.848284	0.854369	0.0185017	0.0390385	27161264	299	0.90606	0.00556	0.0054
inception_v4	80.156	0.851044	0.853943	0.0140775	0.0337705	42679816	299	0.94852	0.00166	0.00191
jx_nest_base	83.536	0.852932	0.862162	0.0551749	0.0403446	67723368	224	0.87734	0.0001	7e-05
jx_nest_small	83.122	0.856352	0.865182	0.0611958	0.0410994	38351176	224	0.85832	0.0007	0.0006
jx_nest_tiny	81.424	0.858176	0.865458	0.0825363	0.0369844	17057608	224	0.822	0.00374	0.00307
legacy_senet154	81.304	0.846673	0.855543	0.0496816	0.0404067	115088984	224	0.8637	0.00018	0.00018
legacy_seresnet101	78.396	0.849423	0.859963	0.0638192	0.0322536	49326872	224	0.84343	0.0047	0.00333
legacy_seresnet152	78.658	0.854123	0.861487	0.0560695	0.0309001	66821848	224	0.85919	0	2e-05
legacy_seresnet18	71.758	0.852818	0.859099	0.0968464	0.022515	11778592	224	0.79866	0.00144	0.00173
legacy_seresnet34	74.808	0.867234	0.865757	0.0392847	0.0166525	21958868	224	1.10222	0.00668	0.00647
legacy_seresnet50	77.636	0.852374	0.861322	0.0706163	0.0269136	28088024	224	0.84073	0.00024	0.00036
legacy_seresnext101_32x4d	80.236	0.85351	0.863427	0.0500516	0.0307143	48955416	224	0.87253	0.00018	0.00029
legacy_seresnext26_32x4d	77.1	0.855031	0.863293	0.0614368	0.0311706	16790280	224	0.83896	0.0004	0.00107
legacy_seresnext50_32x4d	79.076	0.854486	0.854741	0.035656	0.0394057	27559896	224	0.98359	0.0013	0.00013
levit_128	78.494	0.867138	0.866745	0.0257492	0.0268125	9213936	224	0.99462	0.003	0.00309
levit_128s	76.52	0.868358	0.869015	0.0240158	0.031927	7777058	224	0.98097	0.00026	0.00024
levit_192	79.842	0.87046	0.869617	0.0373429	0.0323335	10947069	224	1.01429	0.00356	0.00342
levit_256	81.522	0.871545	0.871321	0.0488531	0.0341296	18893876	224	1.0487	8e-05	2e-05
levit_384	82.594	0.870325	0.869361	0.0487525	0.0377629	39128836	224	1.03859	0.1335	0.1288
mixer_b16_224	76.598	0.864297	0.856068	0.109395	0.0490242	59880472	224	1.22967	0.01206	0.01229
mixer_b16_224_miil	82.308	0.879122	0.879973	0.00514081	0.0162183	59880472	224	0.94587	0.00122	0.00122
mixer_l16_224	72.06	0.803704	0.785353	0.201744	0.0607429	208196168	224	1.49425	0.00032	0.00033
mixnet_l	78.976	0.851741	0.859684	0.0538513	0.0318365	7329252	224	0.86532	0.00056	0.00056
mixnet_m	77.256	0.849333	0.857168	0.0648724	0.0329739	5014382	224	0.84766	0.0013	0.00202
mixnet_s	75.988	0.854691	0.863424	0.0772575	0.0253171	4134606	224	0.83394	0.0014	0.0018
mixnet_xl	80.478	0.840232	0.85341	0.0599086	0.0378749	11896768	224	0.86127	8e-05	9e-05
mnasnet_100	74.656	0.848264	0.856075	0.0628447	0.0231439	4383312	224	0.84517	0.00086	0.00058
mnasnet0_5_torchvision	67.734	0.846175	0.853098	0.0987584	0.0140412	2218512	224	0.80929	0.00054	0.00058
mnasnet1_0_torchvision	73.456	0.866527	0.864779	0.0449426	0.0172506	4383312	224	1.17988	0.0009	0.004
mobilenet_v2_torchvision	71.878	0.860508	0.858622	0.0283595	0.0174249	3504872	224	1.09468	0.14468	0.14157
mobilenet_v3_large_torchvision	74.042	0.868795	0.868375	0.0668228	0.0156899	5483032	224	1.27694	0.18698	0.00211
mobilenet_v3_small_torchvision	67.668	0.862033	0.861804	0.0244548	0.0136058	2542856	224	1.08456	0.12132	0.12329
mobilenetv2_100	72.978	0.853799	0.860438	0.0841586	0.0151625	3504872	224	0.81822	0.1003	0.13326
mobilenetv2_110d	75.052	0.858561	0.864189	0.0772691	0.0164042	4516520	224	0.81861	0.0037	0.00331
mobilenetv2_120d	77.294	0.85773	0.863879	0.0656933	0.019855	5831144	224	0.83341	0.02848	0.03769
mobilenetv2_140	76.524	0.855944	0.863971	0.0753776	0.0193399	6108776	224	0.8176	0.00074	0.00204
mobilenetv3_large_100	75.768	0.858396	0.864516	0.0669804	0.0196201	5483032	224	0.841	0.00224	0.00336
mobilenetv3_large_100_miil	77.914	0.876823	0.877076	0.039531	0.0140665	5483032	224	1.16011	0.21838	0.22202
mobilenetv3_rw	75.628	0.857651	0.864083	0.0645628	0.027783	5479918	224	0.84113	0.00764	0.00764
nasnetalarge	82.622	0.827869	0.837907	0.0439575	0.0459579	88753150	331	0.90643	0.00022	0.0006
nf_regnet_b1	78.7	0.861612	0.868905	0.0785389	0.0306878	10223984	256	0.83134	0.00464	0.00476
nf_resnet50	80.224	0.852353	0.86933	0.172753	0.0239938	25557032	256	0.72291	0.00652	0.00776
nfnet_l0	81.858	0.852153	0.865716	0.104242	0.0281719	35074488	224	0.82381	0.001	0.0008
pit_b_224	82.442	0.844682	0.855848	0.0591698	0.0435327	73764840	224	0.87418	0	2e-05
pit_b_distilled_224	84.14	0.873191	0.867258	0.0708583	0.0297083	74790096	224	1.21538	0.00098	0.00049
pit_s_224	81.082	0.858308	0.866602	0.077696	0.0399256	23461912	224	0.83428	0.00116	0.00096
pit_s_distilled_224	81.99	0.872773	0.869671	0.0589607	0.0242369	24039056	224	1.15162	0.08588	0.04515
pit_ti_224	72.912	0.856769	0.861061	0.111975	0.0243797	4847272	224	0.8056	0.01136	0.00829
pit_ti_distilled_224	74.536	0.863942	0.863372	0.0160868	0.0126585	5104336	224	1.01156	0.0755	0.07424
pit_xs_224	78.178	0.863439	0.869787	0.0932916	0.0302781	10618888	224	0.83082	0.00042	0.00033
pit_xs_distilled_224	79.31	0.869781	0.868662	0.0393631	0.0193253	11003984	224	1.07747	0.12784	0.09435
pnasnet5large	82.784	0.845295	0.851763	0.0568186	0.0490927	86057668	331	0.86052	0.00484	0.00438
regnetx_002	68.754	0.861022	0.859361	0.0204324	0.0152216	2684792	224	1.04578	0.00124	0.00093
regnetx_004	72.406	0.868264	0.867621	0.034031	0.0128304	5157512	224	1.11674	0.00374	0.00111
regnetx_006	73.862	0.866976	0.866471	0.0327739	0.0148042	6196040	224	1.12577	0.17722	0.17211
regnetx_008	75.022	0.866659	0.865885	0.0346003	0.0168959	7259656	224	1.1332	0.16948	0.17275
regnetx_016	76.93	0.869221	0.867833	0.0332521	0.0183653	9190136	224	1.12481	0.2016	0.20137
regnetx_032	78.166	0.866507	0.865085	0.0439744	0.0205694	15296552	224	1.19215	6e-05	0.00391
regnetx_040	78.486	0.868328	0.866162	0.0513962	0.0223749	22118248	224	1.19564	0.00162	0.17895
regnetx_064	79.066	0.86766	0.865383	0.0513881	0.0205872	26209256	224	1.23267	0.21898	0.21764
regnetx_080	79.196	0.867621	0.865305	0.0522991	0.0205024	39572648	224	1.22422	0.00022	0.00016
regnetx_120	79.59	0.866994	0.864725	0.0548075	0.0229485	46106056	224	1.23973	0.22976	0.00071
regnetx_160	79.866	0.870117	0.867298	0.0604836	0.0220136	54278536	224	1.23803	0.00094	0.00098
regnetx_320	80.246	0.866209	0.861698	0.070467	0.0295217	107811560	224	1.2812	0.09958	0.0616
regnety_002	70.282	0.862018	0.861057	0.0191547	0.0109088	3162996	224	1.07077	0.00178	0.00176
regnety_004	74.026	0.866521	0.865936	0.0218089	0.0120108	4344144	224	1.08894	0.18986	0.19517
regnety_006	75.26	0.868893	0.868651	0.0301972	0.0131863	6055160	224	1.12709	0.20698	0.19313
regnety_008	76.314	0.868513	0.867375	0.0246926	0.0122529	6263168	224	1.07411	0.18376	0.17422
regnety_016	77.852	0.870713	0.86941	0.0295441	0.0124203	11202430	224	1.09619	0.19394	0.19237
regnety_032	81.87	0.857111	0.869397	0.123327	0.03339	19436338	224	0.79298	0.0024	0.00271
regnety_040	79.222	0.873603	0.872371	0.0390395	0.0154985	20646656	224	1.12304	0.25453	0.00427
regnety_064	79.712	0.874414	0.872327	0.0462944	0.0147012	30583252	224	1.1712	0.2499	0.23933
regnety_080	79.868	0.869865	0.867126	0.0524025	0.0210651	39180068	224	1.20112	0.20642	0.20373
regnety_120	80.382	0.870951	0.86845	0.053884	0.0214805	51822544	224	1.21008	0.00134	0.22517
regnety_160	82.944	0.850658	0.866624	0.174068	0.034101	83590140	224	0.76013	0.00084	0.00102
regnety_320	80.814	0.869028	0.862986	0.0709653	0.02909	145046770	224	1.28312	0.15764	0.1298
repvgg_a2	76.464	0.867132	0.865959	0.0461182	0.0166328	28210600	224	1.19739	0.00536	0.14166
repvgg_b0	75.15	0.864863	0.863347	0.0367746	0.0177604	15817960	224	1.16055	0.00482	0.00564
repvgg_b1	78.366	0.86663	0.863978	0.0539717	0.0193534	57415016	224	1.23734	0.00032	0.18322
repvgg_b1g4	77.58	0.868408	0.867079	0.0491256	0.0176484	39966056	224	1.19739	0.17536	0.16215
repvgg_b2	78.788	0.865761	0.861969	0.0618913	0.0236823	89022376	224	1.28818	0.00938	0.00564
repvgg_b2g4	79.376	0.853282	0.858754	0.0324017	0.0298218	61758376	224	0.89197	0.0003	0.00156
repvgg_b3	80.502	0.852485	0.855566	0.0306897	0.0371517	123085288	224	0.9425	0.00042	0.00076
repvgg_b3g4	80.214	0.85015	0.855597	0.0299369	0.0371882	83825128	224	0.89344	0.00048	0.00024
res2net101_26w_4s	79.196	0.843704	0.851694	0.0291586	0.0443327	45206688	224	0.88856	0.0003	0.00029
res2net50_14w_8s	78.152	0.847459	0.854025	0.0264747	0.0370277	25059816	224	0.89715	6e-05	4e-05
res2net50_26w_4s	77.946	0.852572	0.860165	0.0369802	0.0349968	25699120	224	0.88344	0.00062	0.00122
res2net50_26w_6s	78.574	0.84476	0.852702	0.0300825	0.0416547	37051448	224	0.89634	0.00104	0.00098
res2net50_26w_8s	79.21	0.845774	0.852717	0.0305786	0.0461761	48403776	224	0.89188	0.00012	0.00018
res2net50_48w_2s	77.514	0.853281	0.860144	0.0434379	0.0290823	25287304	224	0.8675	0.00012	7e-05
res2next50	78.242	0.846528	0.85517	0.0324603	0.0362603	24671464	224	0.88612	0.00052	0.00073
resmlp_12_224	76.65	0.85424	0.863934	0.121218	0.0258086	15350872	224	0.78699	0.0003	0.00027
resmlp_12_distilled_224	77.954	0.859042	0.86313	0.0328003	0.0203715	15350872	224	0.89466	0.00316	0.00387
resmlp_24_224	79.378	0.860191	0.866558	0.0722114	0.0367455	30020680	224	0.84601	0.0002	0.0002
resmlp_24_distilled_224	80.76	0.8647	0.867279	0.0235357	0.0404883	30020680	224	0.92029	0.0019	0.00189
resmlp_36_224	79.772	0.86465	0.869054	0.0612758	0.034149	44690488	224	0.86359	0.00138	0.00129
resmlp_36_distilled_224	81.15	0.86725	0.868651	0.0252481	0.0384962	44690488	224	0.94152	0.00112	0.00102
resmlp_big_24_224	81.038	0.85809	0.864784	0.0523727	0.0491007	129138280	224	0.86025	0.00036	0.00364
resmlp_big_24_224_in22ft1k	84.396	0.858687	0.867031	0.0481479	0.0379782	129138280	224	0.86812	0.00138	0.00156
resmlp_big_24_distilled_224	83.59	0.865846	0.86836	0.0275464	0.034325	129138280	224	0.9378	0.00034	0.00051
resnest101e	82.89	0.817313	0.845484	0.125956	0.0356724	48275016	256	0.821	0.00056	0.00027
resnest14d	75.504	0.843099	0.861254	0.170803	0.0207683	10611688	224	0.72516	0.0116	0.03469
resnest200e	83.85	0.855357	0.864725	0.0646086	0.041071	70201544	320	0.84711	0.00142	0.00147
resnest269e	84.51	0.860529	0.87012	0.0876165	0.0369362	110929480	416	0.84407	0.00052	0.00051
resnest26d	78.482	0.852333	0.86485	0.127326	0.0258143	17069448	224	0.79664	0.00382	0.00349
resnest50d	80.958	0.833523	0.853602	0.103113	0.0390684	27483240	224	0.82205	0.00038	0.00067
resnest50d_1s4x24d	80.99	0.833515	0.85549	0.151149	0.0307149	25677000	224	0.79759	0.0029	0.00238
resnest50d_4s2x40d	81.114	0.836754	0.856536	0.125721	0.0368358	30417592	224	0.81293	0.00014	7e-05
resnet101_torchvision	77.374	0.867628	0.86641	0.0491681	0.0175216	44549160	224	1.19767	0.17174	0.00196
resnet101d	82.316	0.845004	0.862643	0.130968	0.036254	44568392	256	0.78173	0.0039	0.0034
resnet152_torchvision	78.312	0.868022	0.865733	0.0500761	0.0200758	60192808	224	1.20892	0.23076	0.22137
resnet152d	83.03	0.850326	0.864862	0.108927	0.0365093	60212040	256	0.80463	0.00054	0.0006
resnet18_torchvision	69.758	0.85763	0.857547	0.0262038	0.017297	11689512	224	1.0857	0.00156	0.00138
resnet18d	72.27	0.848801	0.860653	0.124375	0.0180329	11708744	224	0.76816	0.00132	0.10689
resnet200d	83.322	0.848399	0.862037	0.0996878	0.0318409	64693064	256	0.82064	0.0013	0.0014
resnet26	75.292	0.847045	0.858041	0.0796294	0.0254875	15995176	224	0.80748	4e-05	2e-05
resnet26d	76.68	0.845564	0.856616	0.0771686	0.0288314	16014408	224	0.80655	0.0005	0.00056
resnet34	75.112	0.849778	0.85556	0.0779845	0.0247843	21797672	224	0.82615	0.00178	0.00193
resnet34_torchvision	73.314	0.861658	0.860546	0.0353016	0.0170932	21797672	224	1.13711	0.15454	0.16273
resnet34d	77.106	0.859656	0.866579	0.0767609	0.0233648	21816904	224	0.83639	0.00068	0.00071
resnet50	79.032	0.852332	0.864493	0.133459	0.0344874	25557032	224	0.73913	0.00124	0.07258
resnet50_torchvision	76.13	0.864191	0.861982	0.037308	0.0216464	25557032	224	1.1208	0.19692	0.18855
resnet50d	80.514	0.849752	0.862931	0.0909313	0.030557	25576264	224	0.82075	0.0004	0.00051
resnet51q	82.01	0.819347	0.863123	0.316822	0.0339639	35696920	256	0.66406	0.00034	0.00031
resnetblur50	79.29	0.853347	0.864548	0.0754403	0.0288028	25557032	224	0.82312	0.00068	0.00084
resnetrs101	80.696	0.861168	0.871111	0.112859	0.0310174	63618696	192	0.79839	0.00088	0.00138
resnetrs152	82.868	0.851215	0.86629	0.115905	0.0379666	86621576	256	0.7909	0.00098	0.001
resnetrs200	83.234	0.859143	0.87021	0.10768	0.0303019	93209992	256	0.79797	0.00114	0.00116
resnetrs270	83.588	0.859657	0.869587	0.113473	0.035594	129861448	256	0.79061	0.0026	0.00273
resnetrs350	84.314	0.861089	0.871228	0.0748209	0.0401594	163956168	288	0.81932	0.00046	0.00051
resnetrs420	84.238	0.837529	0.844186	0.0272365	0.0435197	191891656	320	0.90624	0.0003	0.00042
resnetrs50	77.834	0.858456	0.868775	0.1269	0.0319596	35691912	160	0.78936	0.00312	0.0086
resnetv2_101x1_bitm	82.336	0.8695	0.869992	0.0127455	0.0188639	44541480	448	0.96814	0.29045	0.28037
resnetv2_101x3_bitm	84.436	0.867223	0.864087	0.0386169	0.0267863	387934888	448	1.05993	0.19324	0.17297
resnetv2_152x2_bit_teacher	82.882	0.871892	0.872136	0.022458	0.0191895	236335208	224	1.01091	0.00136	0.00133
resnetv2_152x2_bit_teacher_384	83.84	0.861358	0.855144	0.0549779	0.0300114	236335208	384	1.11184	0.06968	0.03229
resnetv2_152x2_bitm	84.51	0.866113	0.864679	0.0297343	0.0237985	236335208	448	1.02833	0.00544	0.00484
resnetv2_152x4_bitm	84.916	0.859514	0.849857	0.0604933	0.0331243	936533224	480	1.13615	0.0007	0.00293
resnetv2_50x1_bit_distilled	82.826	0.874121	0.875014	0.0130483	0.0182617	25549352	224	0.97891	0.00348	0.00369
resnetv2_50x1_bit_distilled_160_from224teacher	79.994	0.873389	0.875784	0.00739672	0.020439	25549352	160	0.92966	0.0035	0.00393
resnetv2_50x1_bitm	80.336	0.861974	0.863012	0.0152211	0.0140332	25549352	448	0.93164	0.17796	0.198
resnetv2_50x3_bitm	84.022	0.865201	0.865795	0.0281884	0.0229808	217319080	448	1.02064	0.15526	0.12162
resnext101_32x8d_torchvision	79.312	0.862561	0.857145	0.0806427	0.0348673	88791336	224	1.36598	0.13866	0.00153
resnext50_32x4d	79.762	0.851743	0.863284	0.0579909	0.0322264	25028904	224	0.84767	0.0011	0.0012
resnext50_32x4d_torchvision	77.618	0.866144	0.863305	0.0650361	0.0259189	25028904	224	1.26356	0.14364	0.00191
resnext50d_32x4d	79.674	0.854449	0.856108	0.0318936	0.0330482	25048136	224	0.9903	6e-05	0.00178
rexnet_100	77.862	0.856839	0.864986	0.0725746	0.0230079	4796873	224	0.84495	0.00046	0.00078
rexnet_130	79.5	0.86137	0.868868	0.0784028	0.0256608	7557091	224	0.8281	0.00316	0.00836
rexnet_150	80.322	0.856556	0.867496	0.118592	0.023067	9728593	224	0.80218	0.00284	0.00178
rexnet_200	81.636	0.856332	0.866584	0.0669968	0.0294252	16366620	224	0.8498	0.0009	0.00087
selecsls42b	77.176	0.850046	0.862273	0.0648706	0.0319627	32458248	224	0.83193	0.00138	0.00869
selecsls60	77.982	0.855725	0.863976	0.052512	0.0222201	30670768	224	0.86219	0.00018	0.00024
selecsls60b	78.418	0.85937	0.86459	0.02994	0.0243678	32774064	224	0.88815	0.00126	0.00402
semnasnet_100	75.456	0.853249	0.860833	0.0707252	0.0221658	3887038	224	0.83272	0.0013	0.00131
seresnet152d	83.63	0.850267	0.867124	0.139832	0.0361359	66841080	256	0.7856	0.00054	0.00089
seresnet50	80.278	0.847375	0.86421	0.152963	0.0330677	28088024	224	0.76959	0.0035	0.00356
seresnext26d_32x4d	77.604	0.853243	0.863117	0.0538103	0.0313398	16809512	224	0.8398	0.00084	0.00133
seresnext26t_32x4d	77.99	0.849835	0.859834	0.057613	0.0313344	16806976	224	0.83914	0.00062	0.00062
seresnext50_32x4d	81.266	0.855264	0.867263	0.0636821	0.034795	27559896	224	0.84882	0.00056	0.00253
shufflenet_v2_x0_5_torchvision	60.552	0.851503	0.849221	0.0515829	0.0289146	1366792	224	1.09965	0.05096	0.04429
shufflenet_v2_x1_0_torchvision	69.362	0.859704	0.857402	0.0727393	0.0362324	2278604	224	1.16707	0.11342	0.10873
skresnet18	73.044	0.859416	0.86421	0.0869078	0.0145267	11958056	224	0.82325	0.00036	0.00058
skresnet34	76.91	0.863038	0.867108	0.0735873	0.0243268	22282376	224	0.83662	0.0008	0.0008
skresnext50_32x4d	80.15	0.831887	0.843127	0.0330838	0.0421056	27479784	224	0.90225	0.00012	0.00011
spnasnet_100	74.08	0.848715	0.859422	0.0799432	0.0253112	4421616	224	0.81541	0.03554	0.03507
squeezenet1_0_torchvision	58.092	0.842407	0.840404	0.0164837	0.0311634	1248424	224	1.07332	0.00074	0.00051
squeezenet1_1_torchvision	58.178	0.849472	0.84861	0.0102742	0.0185897	1235496	224	1.05997	0.0078	0.00629
ssl_resnet18	72.6	0.851524	0.849746	0.0285411	0.026204	11689512	224	1.13636	0.0002	7e-05
ssl_resnet50	79.228	0.858594	0.857687	0.0525631	0.0208828	25557032	224	1.22709	0.00176	0.0008
ssl_resnext101_32x16d	81.836	0.856998	0.853039	0.0832962	0.0406328	194026792	224	1.29882	0.19448	0.15244
ssl_resnext101_32x4d	80.926	0.861702	0.861328	0.0654501	0.0224269	44177704	224	1.24744	0.00438	0.00147
ssl_resnext101_32x8d	81.626	0.857908	0.854874	0.0752328	0.0286682	88791336	224	1.30223	0.00314	0.11482
ssl_resnext50_32x4d	80.328	0.857228	0.85678	0.0612622	0.0271317	25028904	224	1.23088	0.00136	0.19706
swin_base_patch4_window12_384	86.43	0.864373	0.873712	0.0621152	0.0279758	87903584	384	0.83636	0.00078	0.0012
swin_base_patch4_window7_224	85.266	0.861089	0.871122	0.0821649	0.0303722	87768224	224	0.81477	0.00176	0.00284
swin_large_patch4_window12_384	87.136	0.861742	0.874208	0.0603676	0.0300899	196735516	384	0.83666	0.00094	0.00151
swin_large_patch4_window7_224	86.316	0.864922	0.873481	0.053384	0.0309906	196532476	224	0.83512	0.00158	0.00202
swin_small_patch4_window7_224	83.208	0.852628	0.861198	0.0397328	0.0324403	49606258	224	0.88311	0.0007	0.00144
swin_tiny_patch4_window7_224	81.374	0.856465	0.865395	0.0682324	0.0347885	28288354	224	0.83232	0.00124	0.00122
swsl_resnet18	73.286	0.852814	0.852205	0.0345118	0.0235983	11689512	224	1.10895	0.087	0.00076
swsl_resnet50	81.18	0.85942	0.855843	0.0541908	0.0255785	25557032	224	1.25684	0.00174	0.15244
swsl_resnext101_32x16d	83.338	0.862523	0.857279	0.075558	0.0323353	194026792	224	1.31261	0.1787	0.00016
swsl_resnext101_32x4d	83.234	0.863786	0.860331	0.054668	0.0250096	44177704	224	1.1966	0.21734	0.19462
swsl_resnext101_32x8d	84.294	0.866915	0.863818	0.0632989	0.030738	88791336	224	1.24364	0.27661	0.23839
swsl_resnext50_32x4d	82.18	0.861023	0.85734	0.0573544	0.0308472	25028904	224	1.21613	0.2095	0.18626
tf_efficientnet_b0	76.84	0.860529	0.866754	0.0955447	0.0169206	5288548	224	0.80358	0.00786	0.01858
tf_efficientnet_b0_ap	77.084	0.856715	0.864563	0.0707343	0.0227365	5288548	224	0.8275	0.00116	0.00127
tf_efficientnet_b0_ns	78.652	0.859154	0.862406	0.0780556	0.0202335	5288548	224	0.82744	0.00094	0.00127
tf_efficientnet_b1	78.832	0.865542	0.870796	0.0716742	0.0247261	7794184	240	0.83285	0.00092	0.00171
tf_efficientnet_b1_ap	79.278	0.859076	0.867996	0.0859487	0.0265864	7794184	240	0.81725	0.00558	0.05964
tf_efficientnet_b1_ns	81.386	0.861382	0.867629	0.0880213	0.0316075	7794184	240	0.81164	0.00078	0.00053
tf_efficientnet_b2	80.09	0.863764	0.870512	0.0866579	0.0263623	9109994	260	0.82018	0.0078	0.06135
tf_efficientnet_b2_ap	80.306	0.858823	0.868219	0.0810899	0.0261735	9109994	260	0.83008	0.00046	0.00033
tf_efficientnet_b2_ns	82.38	0.85955	0.867751	0.0902361	0.032843	9109994	260	0.81249	0.00512	0.00202
tf_efficientnet_b3	81.64	0.860155	0.870573	0.0836412	0.0315432	12233232	300	0.82666	0.00054	0.00067
tf_efficientnet_b3_ap	81.828	0.858425	0.869056	0.0851395	0.0290258	12233232	300	0.81549	0.00034	0.00053
tf_efficientnet_b3_ns	84.054	0.852325	0.863514	0.0839223	0.0362875	12233232	300	0.81743	0.0003	0.00047
tf_efficientnet_b4	83.016	0.84394	0.864963	0.142856	0.0346947	19341616	380	0.77623	0.001	0.00158
tf_efficientnet_b4_ap	83.248	0.856994	0.867188	0.0879984	0.0277064	19341616	380	0.82183	0.00284	0.0026
tf_efficientnet_b4_ns	85.158	0.849166	0.863312	0.100675	0.0294176	19341616	380	0.81455	0.00056	0.00129
tf_efficientnet_b5	83.816	0.85828	0.869818	0.0731821	0.0292974	30389784	456	0.84374	0.0005	0.00076
tf_efficientnet_b5_ap	84.254	0.857064	0.870647	0.0905389	0.029982	30389784	456	0.81936	0.00102	0.0014
tf_efficientnet_b5_ns	86.08	0.838961	0.860026	0.0979883	0.0300553	30389784	456	0.8215	0.0007	0.00071
tf_efficientnet_b6	84.112	0.856997	0.871492	0.139919	0.0287228	43040704	528	0.78573	0.00022	0.00171
tf_efficientnet_b6_ap	84.786	0.855581	0.87053	0.113282	0.0320677	43040704	528	0.7953	0.0035	0.00182
tf_efficientnet_b6_ns	86.462	0.85132	0.867861	0.0952724	0.0338107	43040704	528	0.81199	0.00104	0.00124
tf_efficientnet_b7	84.932	0.856081	0.869891	0.0888693	0.0272789	66347960	600	0.82789	0.00088	0.00113
tf_efficientnet_b7_ap	85.118	0.855573	0.871496	0.121602	0.029983	66347960	600	0.79136	0.00052	0.00071
tf_efficientnet_b7_ns	86.838	0.850898	0.868933	0.132827	0.0248845	66347960	600	0.79838	0.0001	0.00011
tf_efficientnet_b8	85.37	0.85382	0.867282	0.0880092	0.0328825	87413142	672	0.82401	0.00016	0.00016
tf_efficientnet_b8_ap	85.368	0.841391	0.860961	0.114031	0.0315044	87413142	672	0.80054	0.00062	0.00071
tf_efficientnet_cc_b0_4e	77.304	0.859096	0.867431	0.0747631	0.0296925	13314116	224	0.83005	0.00058	0.00069
tf_efficientnet_cc_b0_8e	77.908	0.849544	0.862059	0.102314	0.0344353	24013284	224	0.81778	0.00472	0.00393
tf_efficientnet_cc_b1_8e	79.298	0.854996	0.86453	0.0793754	0.0373195	39715968	240	0.83808	0.00016	0.00022
tf_efficientnet_el	80.252	0.857357	0.864863	0.0504722	0.0325353	10589712	300	0.85807	0.00174	0.00378
tf_efficientnet_em	78.122	0.859729	0.865922	0.060587	0.0233886	6899496	240	0.85087	0.0017	0.05638
tf_efficientnet_es	76.602	0.857066	0.864333	0.0800375	0.0189168	5438392	224	0.82509	0.03582	0.0392
tf_efficientnet_l2_ns	88.352	0.854725	0.871851	0.103199	0.0291596	480309308	800	0.80603	0.00054	0.00073
tf_efficientnet_l2_ns_475	88.234	0.867582	0.875141	0.0582966	0.0248895	480309308	475	0.84971	0.00036	0.00031
tf_efficientnet_lite0	74.842	0.860649	0.867414	0.0758234	0.0174041	4652008	224	0.82033	0.00248	0.12378
tf_efficientnet_lite1	76.638	0.835548	0.861276	0.244955	0.0215876	5416680	240	0.67019	0.0058	0.00662
tf_efficientnet_lite2	77.46	0.8419	0.865367	0.225308	0.0205681	6092072	260	0.69069	0.0073	0.02153
tf_efficientnet_lite3	79.812	0.839032	0.863932	0.202574	0.0296474	8197096	300	0.71664	0.00064	0.00109
tf_efficientnet_lite4	81.528	0.800858	0.860338	0.417591	0.0335679	13006568	380	0.62506	0.0039	0.00627
tf_efficientnetv2_b0	76.876	0.865432	0.867747	0.0587738	0.0260101	7139704	192	0.85623	0.00934	0.01756
tf_efficientnetv2_b1	77.918	0.865464	0.869463	0.0515953	0.0300787	8141052	192	0.8626	0.0009	0.00107
tf_efficientnetv2_b2	79.2	0.866671	0.868689	0.0402386	0.0378822	10096086	208	0.87229	0.00038	0.00036
tf_efficientnetv2_b3	80.702	0.861375	0.865724	0.037557	0.043027	14358406	240	0.89227	0.00018	0.00031
tf_efficientnetv2_l	85.238	0.852396	0.865764	0.0960181	0.0384977	118515272	384	0.82507	0.0002	0.00013
tf_efficientnetv2_l_in21ft1k	85.674	0.834353	0.85477	0.0912391	0.0269361	118515272	384	0.81211	0.00386	0.00758
tf_efficientnetv2_m	84.614	0.855331	0.867742	0.105416	0.0406868	54139356	384	0.81595	0.00048	0.00076
tf_efficientnetv2_m_in21ft1k	84.754	0.836294	0.855242	0.0826043	0.0315228	54139356	384	0.81505	0.00502	0.00311
tf_efficientnetv2_s	83.134	0.863001	0.8687	0.0417684	0.0348961	21458488	300	0.88168	0.00054	0.00044
tf_efficientnetv2_s_in21ft1k	83.33	0.833128	0.849572	0.078804	0.0309465	21458488	300	0.82826	0.00084	0.00116
tf_efficientnetv2_xl_in21ft1k	85.534	0.777729	0.811861	0.100126	0.038997	208119808	384	0.82218	0.0006	0.00067
tf_inception_v3	77.858	0.847722	0.852653	0.0202159	0.0395045	23834568	299	0.90323	0.00186	0.00384
tf_mixnet_l	78.77	0.849646	0.859024	0.0589152	0.0318868	7329252	224	0.86227	0.0012	0.00133
tf_mixnet_m	76.95	0.846909	0.857174	0.0762893	0.0330456	5014382	224	0.83478	0.00048	0.00044
tf_mixnet_s	75.648	0.846626	0.858666	0.0905377	0.028699	4134606	224	0.81839	0.0006	0.00342
tf_mobilenetv3_large_075	73.442	0.858896	0.864653	0.0697577	0.0213945	3993528	224	0.84179	0.0423	0.05055
tf_mobilenetv3_large_100	75.516	0.85024	0.859807	0.065141	0.024245	5483032	224	0.85311	0.00098	0.00138
tf_mobilenetv3_large_minimal_100	72.244	0.852992	0.860694	0.0767594	0.017509	3924288	224	0.83038	0.08906	0.10646
tf_mobilenetv3_small_075	65.718	0.850625	0.856181	0.0906724	0.0166682	2041872	224	0.81443	0.0013	0.00133
tf_mobilenetv3_small_100	67.918	0.851315	0.85553	0.0836974	0.0177939	2542856	224	0.8231	0.00142	0.00096
tf_mobilenetv3_small_minimal_100	62.898	0.840979	0.847882	0.0990653	0.0134906	2044736	224	0.81652	0.0506	0.05064
tnt_s_patch16_224	81.532	0.859592	0.865861	0.083598	0.0405921	23755336	224	0.82231	0.00094	0.00044
tresnet_l	81.488	0.865877	0.868473	0.00959001	0.0310029	55989256	224	0.9273	0.0005	0.00051
tresnet_l_448	82.268	0.866809	0.871872	0.0170565	0.0393524	55989256	448	0.88365	0.00044	0.00058
tresnet_m	83.08	0.87905	0.878892	0.0180929	0.0157363	31389032	224	1.01211	0.0005	0.30319
tresnet_m_448	81.712	0.858233	0.868124	0.0710005	0.0404128	31389032	448	0.80983	0.00396	0.00216
tresnet_xl	82.07	0.869226	0.871856	0.013634	0.0314482	78436244	224	0.94967	0.0006	0.00067
tresnet_xl_448	83.048	0.862439	0.86664	0.0170423	0.0378939	78436244	448	0.91651	0.0002	0.00024
twins_pcpvt_base	82.708	0.859615	0.866348	0.0513707	0.0379947	43828456	224	0.85921	0.00374	0.00533
twins_pcpvt_large	83.132	0.857521	0.864387	0.0398688	0.0402336	60989672	224	0.87539	0.0003	0.00049
twins_pcpvt_small	81.09	0.856056	0.865394	0.0702224	0.0359857	24106216	224	0.83578	0.00088	0.00158
twins_svt_base	83.126	0.854685	0.864182	0.0446251	0.0406187	56070952	224	0.87975	0.00094	0.00122
twins_svt_large	83.68	0.846988	0.854248	0.0404321	0.03678	99271400	224	0.91097	0.00066	0.00098
twins_svt_small	81.678	0.854663	0.863456	0.0640927	0.0370926	24060776	224	0.85034	0.00068	0.00064
vgg11_bn_torchvision	70.37	0.863122	0.861069	0.023815	0.0175852	132868840	224	1.05852	0.00044	0.0018
vgg11_torchvision	69.02	0.861854	0.861174	0.0182163	0.0169482	132863336	224	1.02692	0.00012	0.00133
vgg13_bn_torchvision	71.586	0.862957	0.861781	0.0233531	0.0194457	133053736	224	1.09789	0.00064	0.00116
vgg13_torchvision	69.928	0.862417	0.861059	0.0189828	0.0203962	133047848	224	1.05094	0.00014	9e-05
vgg16_bn_torchvision	73.36	0.867604	0.866712	0.0334462	0.018615	138365992	224	1.14769	0.1716	0.00124
vgg16_torchvision	71.592	0.86626	0.86493	0.0259658	0.0185239	138357544	224	1.10072	0.18676	0.17962
vgg19_bn_torchvision	74.218	0.865215	0.864664	0.0375266	0.0184723	143678248	224	1.1592	0.21146	0.21237
vgg19_torchvision	72.376	0.865489	0.864788	0.0267816	0.0198242	143667240	224	1.10899	0.00292	0.20422
visformer_small	82.106	0.843214	0.864562	0.216566	0.0354332	40219592	224	0.74112	0.00024	0.00033
vit_b_16_torchvision	81.068	0.856121	0.864193	0.055971	0.0344268	86567656	224	0.87107	0.00016	0.65327
vit_b_32_torchvision	75.922	0.855745	0.863022	0.0635134	0.0438199	88224232	224	0.84607	0.54921	0.54921
vit_b16_in1k_facebookSWAG	85.286	0.874981	0.873885	0.0284323	0.0171221	86859496	384	1.04927	0.75525	0.75525
vit_base_patch16_224	84.528	0.878352	0.878016	0.0105055	0.0145841	86567656	224	0.97352	0.37583	0.36855
vit_base_patch16_224_miil	84.266	0.879219	0.87931	0.0125498	0.0231492	86540008	224	0.95849	0.2124	0.20662
vit_base_patch16_224_original	81.79	0.876119	0.874727	0.0390325	0.034023	86567656	224	1.03533	0.67343	0.67343
vit_base_patch16_384	85.992	0.882697	0.88142	0.0119903	0.0154563	86859496	384	0.97966	0.41569	0.40197
vit_base_patch16_384_original	84.2	0.87571	0.874648	0.0369641	0.024097	86859496	384	1.09732	0.72507	0.72507
vit_base_patch16_sam_224	80.24	0.881445	0.881091	0.0417433	0.0453967	86567656	224	0.97988	0.29879	0.29548
vit_base_patch32_224	80.712	0.877235	0.876259	0.0131621	0.0130728	88224232	224	1.0056	0.30323	0.29204
vit_base_patch32_384	83.352	0.879827	0.879106	0.0264127	0.0151394	88297192	384	1.06617	0.33343	0.33199
vit_base_patch32_384_original	81.658	0.876197	0.875393	0.0358835	0.026833	88297192	384	1.05768	0.66774	0.66774
vit_base_patch32_sam_224	73.696	0.875251	0.875944	0.0389898	0.0434276	88224232	224	0.97118	0.21368	0.21511
vit_base_patch8_224	85.8	0.882617	0.883343	0.0121006	0.0111928	86576872	224	1.00582	0.77441	0.77441
vit_base_r50_s16_384	84.974	0.882309	0.881693	0.0352802	0.0196702	98950952	384	1.11981	0.39659	0.40072
vit_l_16_torchvision	79.682	0.859748	0.862617	0.0515464	0.0564278	304326632	224	0.92314	0.62476	0.62476
vit_l_32_torchvision	76.962	0.85407	0.859431	0.0422719	0.0502484	306535400	224	0.89268	0.00067	0.01982
vit_l16_in1k_facebookSWAG	88.07	0.86144	0.872682	0.0846504	0.0235101	305174504	512	0.81414	0.82207	0.82207
vit_large_patch16_224	85.84	0.883635	0.884592	0.0148127	0.0165687	304326632	224	0.98888	0.44189	0.4429
vit_large_patch16_224_original	83.056	0.88064	0.879783	0.0441867	0.0326136	304326632	224	1.07396	0.70881	0.70881
vit_large_patch16_384	87.084	0.884946	0.885564	0.0176095	0.014071	304715752	384	1.02877	0.47043	0.46841
vit_large_patch16_384_original	85.154	0.879091	0.878576	0.0447496	0.0309962	304715752	384	1.09749	0.75547	0.75547
vit_large_patch32_384	81.512	0.868009	0.866742	0.0538409	0.0407292	306632680	384	1.08221	0.26235	0.23617
vit_large_patch32_384_original	81.512	0.868009	0.866726	0.0538409	0.0379109	306632680	384	1.09775	0.65476	0.65476
vit_large_r50_s32_224	84.422	0.880907	0.881929	0.0178892	0.0221738	328994856	224	0.96418	0.40553	0.41512
vit_large_r50_s32_384	86.176	0.883752	0.882721	0.0169432	0.01763	329092136	384	0.99863	0.44437	0.4377
vit_small_patch16_224	81.388	0.876245	0.876056	0.0113759	0.0131362	22050664	224	0.99032	0.00156	0.00167
vit_small_patch16_224_original	77.856	0.856615	0.863702	0.0417463	0.0344436	48754408	224	0.87755	0.58925	0.58925
vit_small_patch16_384	83.796	0.878281	0.879421	0.0131369	0.00883282	22196584	384	1.02834	0.36155	0.36857
vit_small_patch32_224	75.99	0.870648	0.870078	0.00649682	0.00782385	22878952	224	0.98755	0.22952	0.22366
vit_small_patch32_384	80.482	0.871719	0.871586	0.00892389	0.00877147	22915432	384	1.00825	0.27063	0.27973
vit_small_r26_s32_224	81.858	0.877878	0.878039	0.0181783	0.0182447	36431912	224	1.00109	0.35423	0.34604
vit_small_r26_s32_384	84.042	0.878663	0.879063	0.0178399	0.0141144	36468392	384	1.0212	0.00166	0.00182
vit_tiny_patch16_224	75.466	0.868636	0.86837	0.00541446	0.00809362	5717416	224	1.01278	0.21568	0.21275
vit_tiny_patch16_384	78.422	0.873721	0.873338	0.008695	0.00731871	5790376	384	1.01345	0.26071	0.25984
vit_tiny_r_s16_p8_224	71.796	0.863125	0.862138	0.00637545	0.00797136	6337704	224	0.98516	0.17166	0.17102
vit_tiny_r_s16_p8_384	75.954	0.867965	0.867683	0.00610761	0.00743553	6355944	384	1.02397	0.21754	0.21508
wide_resnet101_2_torchvision	78.846	0.867653	0.863703	0.053898	0.0292789	126886696	224	1.17149	0.20508	0.18864
wide_resnet50_2	81.45	0.849069	0.862907	0.0911791	0.0363399	68883240	224	0.81962	0.0015	0.00211
wide_resnet50_2_torchvision	78.468	0.867063	0.865645	0.0544558	0.0279506	68883240	224	1.17053	0.1883	0.18293
xception	79.048	0.84832	0.858316	0.0544131	0.0341253	22855952	299	0.84031	0.00586	0.00404
xception41	78.504	0.849292	0.843502	0.0791553	0.0426216	26969560	299	1.19146	0.0038	0.00067
xception65	79.55	0.840329	0.841753	0.0447965	0.048552	39916312	299	0.98236	0.0045	0.00093
xception71	79.882	0.841465	0.841475	0.0416883	0.0445486	42338736	299	0.98655	0.00072	0.00373
xcit_large_24_p16_224	82.898	0.834709	0.844002	0.0590056	0.0467322	189096136	224	0.8895	0.0001	9e-05
xcit_large_24_p16_224_dist	84.918	0.85561	0.859307	0.0382452	0.042013	189096136	224	0.92861	0.00038	0.00058
xcit_large_24_p16_384_dist	85.756	0.860764	0.864809	0.0366626	0.0373455	189096136	384	0.93927	0	0
xcit_large_24_p8_224	84.392	0.844217	0.85415	0.0600709	0.0400518	188932648	224	0.87335	0.00052	0.00071
xcit_large_24_p8_224_dist	85.402	0.856742	0.861427	0.0378348	0.0421964	188932648	224	0.92429	0.00042	0.00056
xcit_large_24_p8_384_dist	85.992	0.861635	0.864469	0.0378964	0.0398279	188932648	384	0.93002	0.00072	0.00169
xcit_medium_24_p16_224	82.642	0.840466	0.848881	0.0615489	0.0489739	84395752	224	0.88884	6e-05	9e-05
xcit_medium_24_p16_224_dist	84.282	0.861529	0.866008	0.0426284	0.0438769	84395752	224	0.93442	0.00044	0.00051
xcit_medium_24_p16_384_dist	85.424	0.863623	0.865503	0.0387504	0.0404048	84395752	384	0.92786	0.00092	0.00107
xcit_medium_24_p8_224	83.744	0.842277	0.850647	0.057785	0.0433161	84323624	224	0.88557	0.0001	9e-05
xcit_medium_24_p8_224_dist	85.074	0.861761	0.864006	0.039932	0.039719	84323624	224	0.93739	0	0
xcit_medium_24_p8_384_dist	85.82	0.863	0.86544	0.0372464	0.0372365	84323624	384	0.93733	4e-05	4e-05
xcit_nano_12_p16_224	69.958	0.85464	0.85728	0.121276	0.0241516	3053224	224	0.79963	0.0086	0.01591
xcit_nano_12_p16_224_dist	72.316	0.85316	0.85522	0.0602846	0.0192105	3053224	224	0.86187	0.00168	0.00122
xcit_nano_12_p16_384_dist	75.466	0.855964	0.858651	0.056286	0.0238449	3053224	384	0.85405	0.00292	0.00407
xcit_nano_12_p8_224	73.91	0.854088	0.858335	0.142866	0.0202525	3049016	224	0.78378	0.01784	0.04591
xcit_nano_12_p8_224_dist	76.33	0.856245	0.860045	0.0490583	0.0204544	3049016	224	0.87484	0.0016	0.00153
xcit_nano_12_p8_384_dist	77.818	0.859291	0.86306	0.0492153	0.0204116	3049016	384	0.87117	0.00156	0.00142
xcit_small_12_p16_224	81.968	0.854154	0.861621	0.0638566	0.0459982	26253304	224	0.86719	0.00018	0.00038
xcit_small_12_p16_224_dist	83.33	0.859052	0.863763	0.0417363	0.0432734	26253304	224	0.93122	4e-05	4e-05
xcit_small_12_p16_384_dist	84.706	0.861276	0.866043	0.0405545	0.0404898	26253304	384	0.91539	0.00014	0.00011
xcit_small_12_p8_224	83.334	0.853154	0.861328	0.0681504	0.0419745	26213032	224	0.85036	0.0005	0.00058
xcit_small_12_p8_224_dist	84.244	0.858994	0.863252	0.0391674	0.0403663	26213032	224	0.92395	0.0002	0.00013
xcit_small_12_p8_384_dist	85.084	0.86255	0.865868	0.0385205	0.0374157	26213032	384	0.92589	0.00034	0.00036
xcit_small_24_p16_224	82.582	0.849919	0.858119	0.0668614	0.0455819	47671384	224	0.86565	0.00026	0.00038
xcit_small_24_p16_224_dist	83.876	0.857469	0.862463	0.0413092	0.0414328	47671384	224	0.92883	0.00082	0.00131
xcit_small_24_p16_384_dist	85.096	0.861807	0.865296	0.0398672	0.0402413	47671384	384	0.9202	0.00232	0.00878
xcit_small_24_p8_224	83.832	0.853984	0.861546	0.0637828	0.0421815	47631112	224	0.86262	2e-05	2e-05
xcit_small_24_p8_224_dist	84.864	0.859872	0.864858	0.0403348	0.0423184	47631112	224	0.91972	0.0003	0.00042
xcit_small_24_p8_384_dist	85.552	0.865192	0.868459	0.0395537	0.0374807	47631112	384	0.93286	0.00012	0.00018
xcit_tiny_12_p16_224	77.136	0.859504	0.864244	0.106214	0.0319509	6716272	224	0.81513	0.00108	0.00113
xcit_tiny_12_p16_224_dist	78.576	0.860008	0.863421	0.0291758	0.0351766	6716272	224	0.88924	0.0013	0.00136
xcit_tiny_12_p16_384_dist	80.936	0.858567	0.862033	0.0300058	0.0322442	6716272	384	0.88895	0.00078	0.00067
xcit_tiny_12_p8_224	79.69	0.858511	0.862448	0.0885846	0.0368358	6706504	224	0.8218	2e-05	2e-05
xcit_tiny_12_p8_224_dist	81.214	0.858092	0.861343	0.0297867	0.0402527	6706504	224	0.8966	0.00022	0.00016
xcit_tiny_12_p8_384_dist	82.39	0.860488	0.864177	0.0302059	0.0374445	6706504	384	0.89934	0.00058	0.00044
xcit_tiny_24_p16_224	79.45	0.860958	0.866193	0.0922686	0.0369415	12116896	224	0.82693	0.00068	0.00122
xcit_tiny_24_p16_224_dist	80.458	0.860865	0.864215	0.0338923	0.0369956	12116896	224	0.90216	0.00046	0.00056
xcit_tiny_24_p16_384_dist	82.566	0.860904	0.863156	0.0305592	0.0354066	12116896	384	0.89315	0.00014	0.00013
xcit_tiny_24_p8_224	81.89	0.861736	0.868601	0.0829084	0.0361122	12107128	224	0.8395	0.00054	0.01707
xcit_tiny_24_p8_224_dist	82.572	0.861019	0.866564	0.034769	0.037413	12107128	224	0.91429	0.00046	0.00064
xcit_tiny_24_p8_384_dist	83.744	0.861924	0.866324	0.0353996	0.0359748	12107128	384	0.91006	0.0019	0.00289
